# Supplementary material for: Osteoporotic vertebral deformity with endplate/cortex fracture is associated with higher further vertebral fracture risk: the Ms. OS (Hong Kong) study results
Source: Springer Nature journal article supplement (doi:10.1007/s00198-019-04856-4), 2019-01-22
Supplement: MOESM2 [file 16411866]

**p-values (Bonferroni adjustment) for table 1**

(cells with significant p values are dyed yellow)

p-value of t-test (age)

| **i/j** | vd0/ecf0  (group 1) | vd1/ecf0  vd1/ecf1  (group 2) | vd2m/ecf0 vd2m/ecf1  vd2s/ecf1  (group 3) | vd3/ecf1  (group 4) |
| --- | --- | --- | --- | --- |
| **1** |  | 0.0642 | 0.0012 | <.0001 |
| **2** |  |  | 1 | 0.1626 |
| **3** |  |  |  | 0.357 |

*For example, if we compare group-2 vs group-3, the p value is 1.*

p-value of t-test (total hip BMD)

| **i/j** | vd0/ecf0  (group 1) | vd1/ecf0  vd1/ecf1  (group 2) | vd2m/ecf0 vd2m/ecf1  vd2s/ecf1  (group 3) | vd3/ecf1  (group 4) |
| --- | --- | --- | --- | --- |
| **1** |  | 0.1308 | <.0001 | <.0001 |
| **2** |  |  | 0.7716 | 0.009 |
| **3** |  |  |  | 0.3702 |

*For example, if we compare group-3 vs group-4, the p value is 0.3702*

p-value of t-test (lumbar spine BMD)

| **i/j** | vd0/ecf0  (group 1) | vd1/ecf0  vd1/ecf1  (group 2) | vd2m/ecf0 vd2m/ecf1  vd2s/ecf1  (group 3) | vd3/ecf1  (group 4) |
| --- | --- | --- | --- | --- |
| **1** |  | 1 | 0.8448 | <.0001 |
| **2** |  |  | 1 | 0.0168 |
| **3** |  |  |  | 0.0078 |

p-value of chi-square (progression of VD by subject)

| **i/j** | vd0/ecf0  (group 1) | vd1/ecf0  vd1/ecf1  (group 2) | vd2m/ecf0 vd2m/ecf1  vd2s/ecf1  (group 3) | vd3/ecf1  (group 4) |
| --- | --- | --- | --- | --- |
| **1** |  | - | - | - |
| **2** |  |  | 1 | 0.0024 |
| **3** |  |  |  | 0.0042 |

p-value of chi-square (VD new incident by subject)

| **i/j** | vd0/ecf0  (group 1) | vd1/ecf0  vd1/ecf1  (group 2) | vd2m/ecf0 vd2m/ecf1  vd2s/ecf1  (group 3) | vd3/ecf1  (group 4) |
| --- | --- | --- | --- | --- |
| **1** |  | 1 | 0.1338 | <0.0001 |
| **2** |  |  | 0.9192 | 0.0006 |
| **3** |  |  |  | 0.0138 |

p-value of chi-square (VD progression or VD new incident by subject)

| **i/j** | vd0/ecf0  (group 1) | vd1/ecf0  vd1/ecf1  (group 2) | vd2m/ecf0 vd2m/ecf1  vd2s/ecf1  (group 3) | vd3/ecf1  (group 4) |
| --- | --- | --- | --- | --- |
| **1** |  | 1 | 0.0414 | <0.0001 |
| **2** |  |  | 1 | 0.0048 |
| **3** |  |  |  | 0.0084 |

**p-values (Bonferroni adjustement) for table 2**

(cells with significant p values are dyed yellow)

p-value of t-test (age)

|  | **group1** | **group2** | **group3** | **group4** | **group5** | **group6** | **group7** |
| --- | --- | --- | --- | --- | --- | --- | --- |
| **i/j** | **vd0/ecf0** | **vd1/ecf0** | **vd2m/ecf0** | **vd1/ecf1** | **vd2m/ecf1** | **vd2s/ecf1** | **vd3/ecf1** |
| **1** |  | 0.1659 | 1 | 1 | 0.1356 | 0.6587 | <.0001 |
| **2** |  |  | 1 | 1 | 1 | 1 | 1 |
| **3** |  |  |  | 1 | 1 | 1 | 1 |
| **4** |  |  |  |  | 1 | 1 | 0.5239 |
| **5** |  |  |  |  |  | 1 | 1 |
| **6** |  |  |  |  |  |  | 1 |

p-value of t-test (total hip BMD)

|  | **group1** | **group2** | **group3** | **group4** | **group5** | **group6** | **group7** |
| --- | --- | --- | --- | --- | --- | --- | --- |
| **i/j** | **vd0/ecf0** | **vd1/ecf0** | **vd2m/ecf0** | **vd1/ecf1** | **vd2m/ecf1** | **vd2s/ecf1** | **vd3/ecf1** |
| **1** |  | 0.3669 | 0.6676 | 1 | 0.0005 | 0.6354 | <.0001 |
| **2** |  |  | 1 | 1 | 1 | 1 | 0.3183 |
| **3** |  |  |  | 1 | 1 | 1 | 1 |
| **4** |  |  |  |  | 0.8086 | 1 | 0.0984 |
| **5** |  |  |  |  |  | 1 | 1 |
| **6** |  |  |  |  |  |  | 0.5977 |

p-value of t-test (lumbar spine BMD)

|  | **group1** | **group2** | **group3** | **group4** | **group5** | **group6** | **group7** |
| --- | --- | --- | --- | --- | --- | --- | --- |
| **i/j** | **vd0/ecf0** | **vd1/ecf0** | **vd2m/ecf0** | **vd1/ecf1** | **vd2m/ecf1** | **vd2s/ecf1** | **vd3/ecf1** |
| **1** |  | 1 | 1 | 1 | 1 | 1 | <.0001 |
| **2** |  |  | 1 | 1 | 1 | 1 | 0.1586 |
| **3** |  |  |  | 1 | 1 | 1 | 0.2441 |
| **4** |  |  |  |  | 1 | 1 | 0.8209 |
| **5** |  |  |  |  |  | 1 | 0.715 |
| **6** |  |  |  |  |  |  | 0.268 |

p-value of t-test (no. VD per subject)

|  | **group1** | **group2** | **group3** | **group4** | **group5** | **group6** | **group7** |
| --- | --- | --- | --- | --- | --- | --- | --- |
| **i/j** | **vd0/ecf0** | **vd1/ecf0** | **vd2m/ecf0** | **vd1/ecf1** | **vd2m/ecf1** | **vd2s/ecf1** | **vd3/ecf1** |
| **1** |  | - | - | - | - | - | - |
| **2** |  |  | 1 | 1 | 1 | 1 | **<.0001** |
| **3** |  |  |  | 0.2025 | 1 | 1 | **0.0195** |
| **4** |  |  |  |  | 1 | 0.744 | **<.0001** |
| **5** |  |  |  |  |  | 1 | **<.0001** |
| **6** |  |  |  |  |  |  | **<.0001** |

p-value of t-test (no. ECF(+) per subject at baseline)

|  | **group1** | **group2** | **group3** | **group4** | **group5** | **group6** | **group7** |
| --- | --- | --- | --- | --- | --- | --- | --- |
| **i/j** | **vd0/ecf0** | **vd1/ecf0** | **vd2m/ecf0** | **vd1/ecf1** | **vd2m/ecf1** | **vd2s/ecf1** | **vd3/ecf1** |
| **1** |  | - | - | - | - | - | - |
| **2** |  |  | - | - | - | - | - |
| **3** |  |  |  | - | - | - | - |
| **4** |  |  |  |  | 0.567 | 1 | **<.0001** |
| **5** |  |  |  |  |  | 1 | **<.0001** |
| **6** |  |  |  |  |  |  | **<.0001** |

p-value of chi-square (progression of VD by subject)

|  | **group1** | **group2** | **group3** | **group4** | **group5** | **group6** | **group7** |
| --- | --- | --- | --- | --- | --- | --- | --- |
| **i/j** | **vd0/ecf0** | **vd1/ecf0** | **vd2m/ecf0** | **vd1/ecf1** | **vd2m/ecf1** | **vd2s/ecf1** | **vd3/ecf1** |
| **1** |  | - | - | - | - | - | - |
| **2** |  |  | 1 | 1 | 1 | 1 | **0.0225** |
| **3** |  |  |  | 1 | 1 | 1 | 0.3105 |
| **4** |  |  |  |  | 1 | 1 | 1 |
| **5** |  |  |  |  |  | 1 | 0.8055 |
| **6** |  |  |  |  |  |  | 0.3345 |

p-value of chi-square (progression of VD by vertebra)

|  | **group1** | **group2** | **group3** | **group4** | **group5** | **group6** | **group7** |
| --- | --- | --- | --- | --- | --- | --- | --- |
| **i/j** | **vd0/ecf0** | **vd1/ecf0** | **vd2m/ecf0** | **vd1/ecf1** | **vd2m/ecf1** | **vd2s/ecf1** | **vd3/ecf1** |
| **1** |  | - | - | - | - | - | - |
| **2** |  |  | 1 | 1 | 0.1635 | 0.9495 | **0.018** |
| **3** |  |  |  | 1 | 0.432 | 1 | 0.132 |
| **4** |  |  |  |  | 1 | 1 | 1 |
| **5** |  |  |  |  |  | 1 | 1 |
| **6** |  |  |  |  |  |  | 1 |

p-value of chi-square (VD new incident by subject)

|  | **group1** | **group2** | **group3** | **group4** | **group5** | **group6** | **group7** |
| --- | --- | --- | --- | --- | --- | --- | --- |
| **i/j** | **vd0/ecf0** | **vd1/ecf0** | **vd2m/ecf0** | **vd1/ecf1** | **vd2m/ecf1** | **vd2s/ecf1** | **vd3/ecf1** |
| **1** |  | 1 | 1 | 1 | 0.126 | 1 | **<0.0001** |
| **2** |  |  | 1 | 1 | 0.672 | 1 | **0.0063** |
| **3** |  |  |  | 1 | 1 | 1 | 0.672 |
| **4** |  |  |  |  | 1 | 1 | 1 |
| **5** |  |  |  |  |  | 1 | 1 |
| **6** |  |  |  |  |  |  | 0.3444 |

p-value of chi-square (VD new incident by vertebra)

|  | **group1** | **group2** | **group3** | **group4** | **group5** | **group6** | **group7** |
| --- | --- | --- | --- | --- | --- | --- | --- |
| **i/j** | **vd0/ecf0** | **vd1/ecf0** | **vd2m/ecf0** | **vd1/ecf1** | **vd2m/ecf1** | **vd2s/ecf1** | **vd3/ecf1** |
| **1** |  | 1 | 1 | 1 | **<0.0001** | **0.0441** | **<0.0001** |
| **2** |  |  | 1 | 1 | **0.0336** | 0.4998 | **<0.0001** |
| **3** |  |  |  | 1 | 1 | 1 | 0.2646 |
| **4** |  |  |  |  | 1 | 1 | 0.2751 |
| **5** |  |  |  |  |  | 1 | 1 |
| **6** |  |  |  |  |  |  | 0.5922 |

p-value of chi-square (ECF new incident by subject)

|  | **group1** | **group2** | **group3** | **group4** | **group5** | **group6** | **group7** |
| --- | --- | --- | --- | --- | --- | --- | --- |
| **i/j** | **vd0/ecf0** | **vd1/ecf0** | **vd2m/ecf0** | **vd1/ecf1** | **vd2m/ecf1** | **vd2s/ecf1** | **vd3/ecf1** |
| **1** |  | **<0.0001** | **<0.0001** |  |  |  |  |
| **2** |  |  | **0.0006** |  |  |  |  |
| **3** |  |  |  |  |  |  |  |
| **4** |  |  |  |  |  |  |  |
| **5** |  |  |  |  |  |  |  |
| **6** |  |  |  |  |  |  |  |

p-value of chi-square (ECF new incident by vertebra)

|  | **group1** | **group2** | **group3** | **group4** | **group5** | **group6** | **group7** |
| --- | --- | --- | --- | --- | --- | --- | --- |
| **i/j** | **vd0/ecf0** | **vd1/ecf0** | **vd2m/ecf0** | **vd1/ecf1** | **vd2m/ecf1** | **vd2s/ecf1** | **vd3/ecf1** |
| **1** |  | **<0.0001** | **<0.0001** |  |  |  |  |
| **2** |  |  | **<0.0001** |  |  |  |  |
| **3** |  |  |  |  |  |  |  |
| **4** |  |  |  |  |  |  |  |
| **5** |  |  |  |  |  |  |  |
| **6** |  |  |  |  |  |  |  |
